# Supplementary material
Source: PubMed Central journal article supplement (PMC7391245)
Supplement: NIHMS1601609-supplement-1.pdf [file NIHMS1601609-supplement-1.pdf]

# Human Natural Killer Cell Cytoskeletal Dynamics and Cytotoxicity are Regulated by LIM Kinase

## Supplementary Materials

**Authors:** Melody G. Duvall<sup>1,2</sup>, Mary E. Fuhlbrigge<sup>1</sup>, Roisin B. Reilly<sup>1</sup>, Katherine H. Walker<sup>1</sup>, Ayşe Kılıç<sup>1,3</sup>, Bruce D. Levy<sup>1\*</sup>

### **Affiliations:**

<sup>1</sup> Division of Pulmonary and Critical Care Medicine, Department of Medicine, Brigham and Women's Hospital, Harvard Medical School, Boston, MA 02115, USA.

<sup>2</sup> Division of Critical Care Medicine, Department of Anesthesiology, Critical Care and Pain Medicine, Boston Children's Hospital, Harvard Medical School, Boston, MA 02115, USA.

<sup>3</sup> Channing Division of Network Medicine, Department of Medicine, Brigham and Women's Hospital, Harvard Medical School, Boston, MA 02115, USA

\*Corresponding Author: Bruce D. Levy, 60 Fenwood Road, Boston, MA, 02115, USA. Phone: 617-525-5407; Fax: 617-732-7421; Email: [blevy@bwh.harvard.edu](mailto:blevy@bwh.harvard.edu)

## Supplemental Figure 1

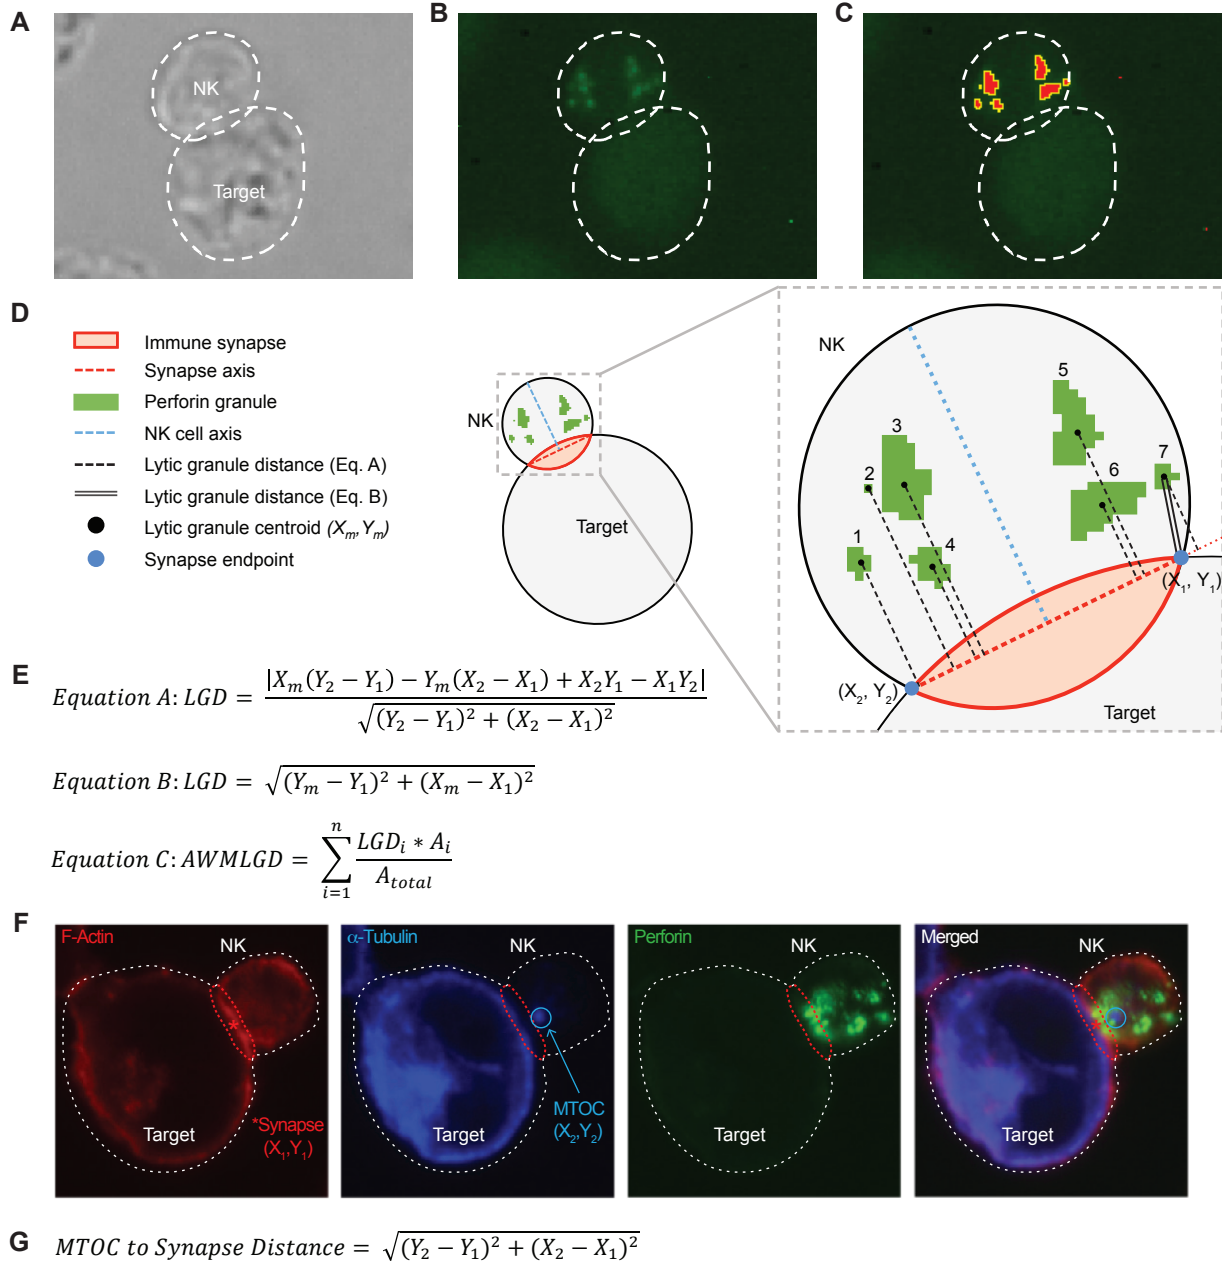

### Supplemental Figure 1. Analysis of NK cell immunofluorescence and confocal microscopy.

**(A)** Cell perimeters of NK:target conjugates were outlined as regions of interest (ROIs). **(B)** ROIs were applied to immunofluorescence images (perforin; green). **(C)** Centroid coordinates of each lytic granule were noted  $(X_m, Y_m)$ . **(D)** The immune synapse was identified as the overlap of NK and target cell perimeters (red shaded area). Coordinates of synapse endpoints were noted  $(X_1, Y_1)$  and  $(X_2, Y_2)$ . The red dashed line connecting the points is the synapse axis. **(E)** Distance from each lytic granule to the synapse axis was calculated using Equation A (black dashed lines in panel D). For granules outside the synapse axis (e.g. Granule 7), Equation B was used to calculate the distance to the nearest synapse endpoint (black double line in panel D). Equation C was used to calculate area-weighted mean lytic granule distance (AWMLGD). See Methods “Immunofluorescence microscopy”. **(F)** Confocal microscopy was used to image NK:target conjugates for F-actin (phalloidin, red), perforin (green), and  $\alpha$ -tubulin (blue). Phalloidin signal was measured within the immune synapse (red dashed line). Centroid coordinates of phalloidin signal within the synapse were noted (red star;  $X_1, Y_1$ ). NK cell MTOC was identified ( $\alpha$ -tubulin, blue circle;  $X_2, Y_2$ ). Perforin density within the immune synapse was determined. **(G)** Distance between immune synapse center  $(X_1, Y_1)$  and the MTOC  $(X_2, Y_2)$  was calculated for each NK:target conjugate. See Methods section “Confocal Microscopy”.

## Supplemental Figure 2

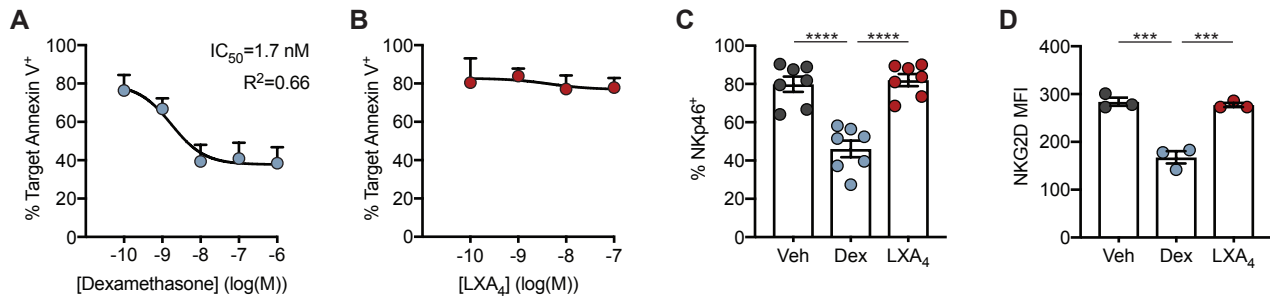

**Supplemental Figure 2. Dexamethasone and LXA<sub>4</sub> concentration response curves and NK cell activating receptor expression.** A concentration response curve was established for dexamethasone and LXA<sub>4</sub> effect on NK cells using K562 target cell apoptosis as the readout. NK cells isolated from healthy donors were exposed to serial-dilutions of **(A)** dexamethasone (100 pM to 1 μM, blue), or **(B)** lipoxin A<sub>4</sub> (100 pM to 100 nM, red) for 48 hours. **(A-B)** Treated NK cells were co-cubated with K562 target cells at 5:1 effector:target ratio for 4 hours and NK cell-mediated target cell apoptosis was assessed by flow cytometry staining for annexin-V and 7-AAD (% Target Annexin V<sup>+</sup>). log(Dex) and log(LXA<sub>4</sub>) concentration response curves were generated and nonlinear regression was performed using least squares regression fitting method to calculate the IC<sub>50</sub> for dexamethasone. R<sup>2</sup> goodness of fit measure is shown. n=3 experiments. Symbols denote mean ± SEM. **(C-D)** NK cells were exposed to vehicle control (Veh, grey), 1 μM dexamethasone (Dex, blue), or 100 nM lipoxin A<sub>4</sub> (LXA<sub>4</sub>, red) for 48 hours. **(C)** Percentage of NK cells expressing the activating receptor NKp46 was analyzed for each condition by flow cytometry. n=7 experiments. **(D)** Median fluorescence intensity (MFI) of NKG2D expression on NK cells was analyzed by flow cytometry. n=3 experiments. Bars show mean ± SEM with individual data points. \*\*\*p<0.005 and \*\*\*\*p<0.0001 by repeated measures one-way ANOVA with Tukey's multiple comparisons test.

### Supplemental Figure 3

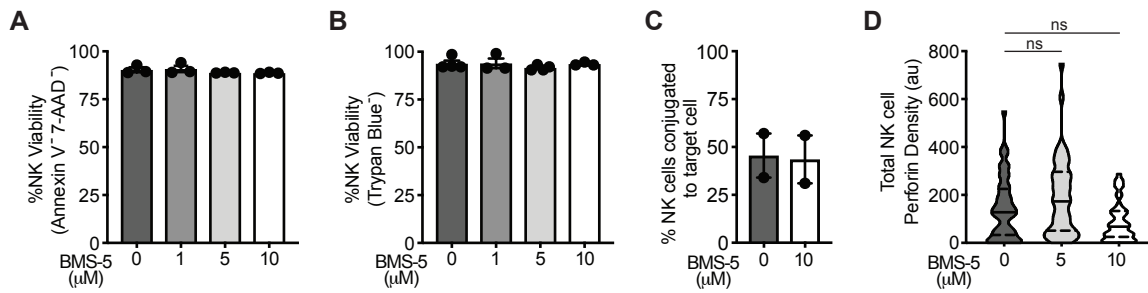

**Supplemental Figure 3. LIMK inhibition does not impair NK cell viability, NK:target conjugate formation, or NK cell perforin content.** NK cells were exposed to the LIMK inhibitor BMS-5 for 48 hours and NK cell viability was assessed by **(A)** flow cytometry staining for annexin V and 7-AAD and **(B)** trypan blue evaluation. NK cell viability was  $\geq 85\%$  in all conditions;  $n=3$  individual experiments. NK cells exposed to BMS-5 for 48 hours were subsequently co-incubated with K562 target cells for 2 hours. **(C)** The percentage of NK cells conjugated to target K562 cells was evaluated by confocal microscopy in  $n=2$  experiments. Total NK cells observed was  $> 200$  per condition. **(D)** Confocal microscopy was used to image NK:target conjugates for intracellular perforin (AF488, green) in BMS-5  $5\mu\text{M}$  and  $10\mu\text{M}$  conditions relative to control. Total NK cell perforin integrated density (area x MFI) was quantified for each NK:target conjugate.  $n=3$  experiments, 49-51 total NK:target conjugates imaged and quantified per condition. Bars show mean  $\pm$  SEM and violin plots depict density distribution with median (line) and interquartile ranges (dashed line). ns = not significant.

## Supplemental Figure 4

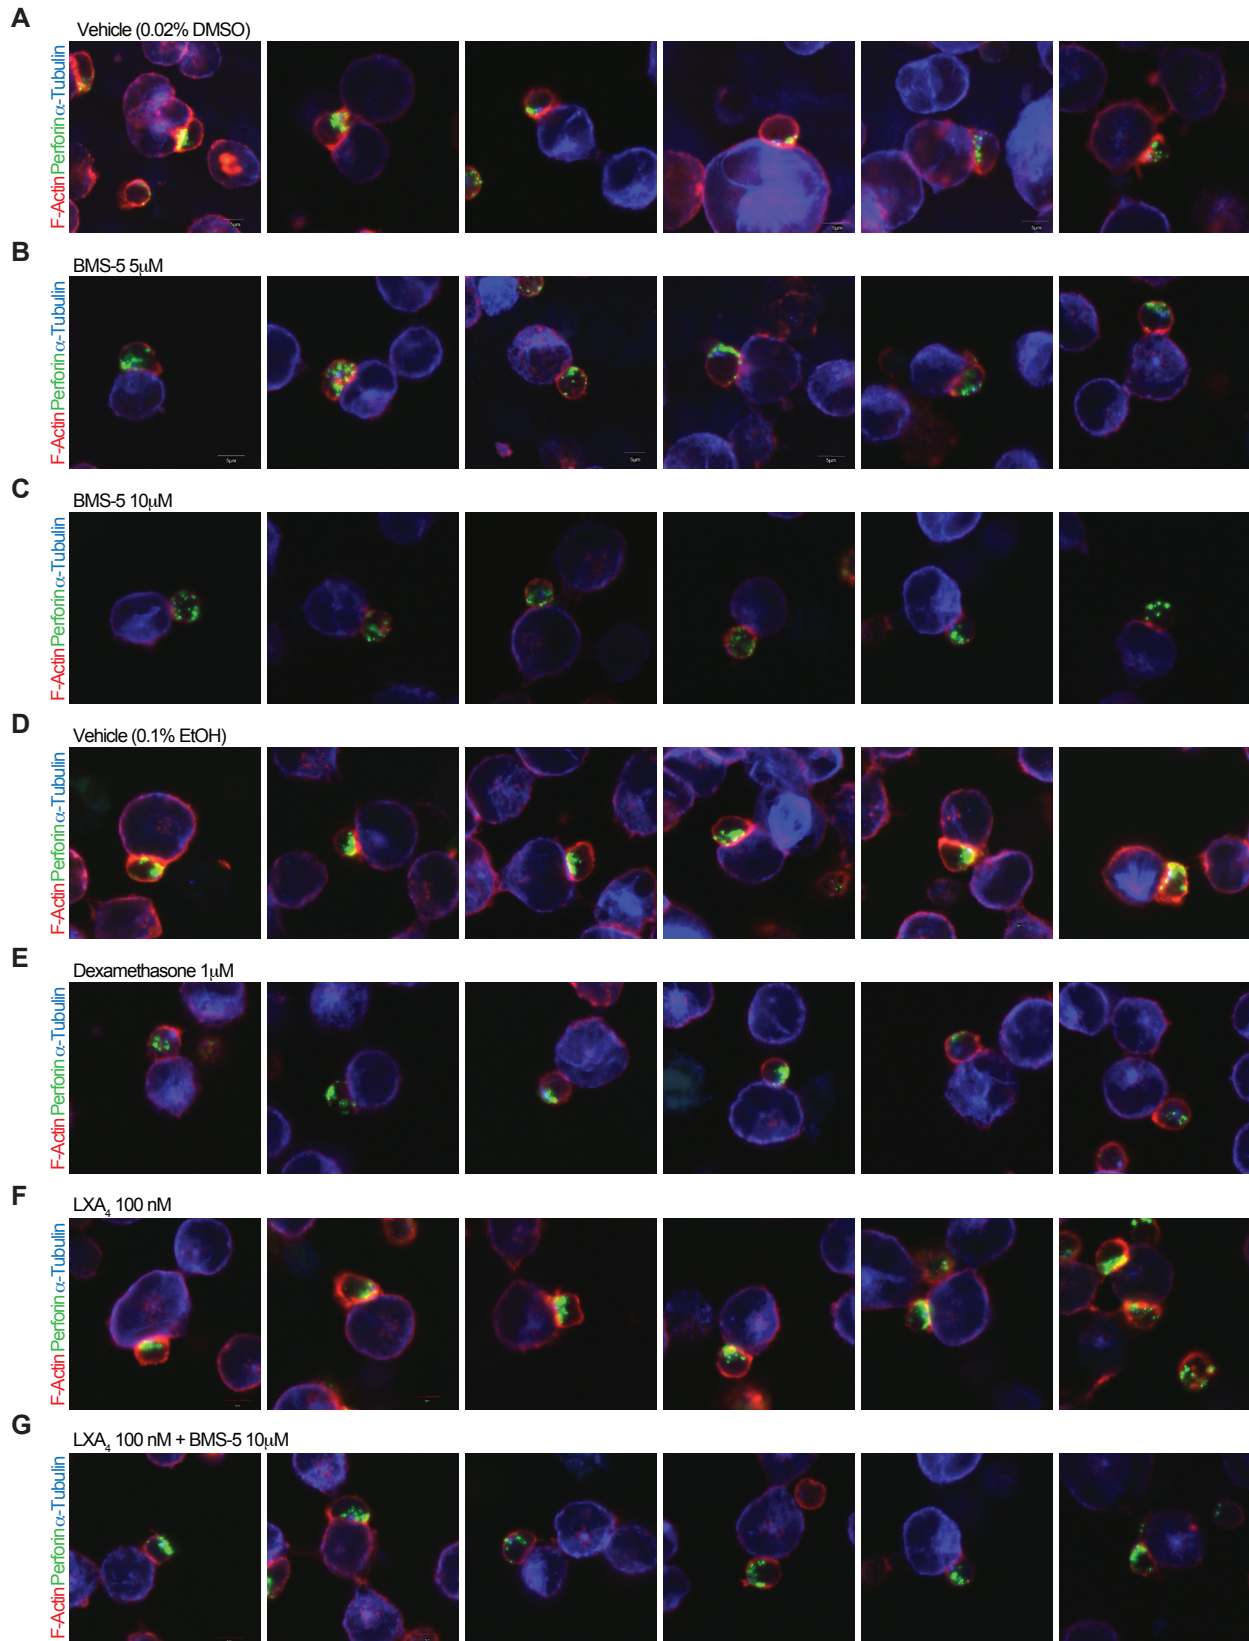

**Supplemental Figure 4. Supplemental confocal microscopy images.** NK cells were exposed to noted conditions for 48 hours before co-incubation with K562 target cells for 2 hours. Confocal microscopy was utilized to image F-actin (phalloidin AF555, red), perforin (AF488, green), and  $\alpha$ -tubulin (AF647, blue) in NK:target conjugates. Merged images are shown for 6 representative images for the following conditions: **(A)** Vehicle (0.02% DMSO), **(B)** BMS-5 5 $\mu$ M, **(C)** BMS-5 10 $\mu$ M, **(D)** Vehicle (0.1% EtOH), **(E)** Dexamethasone 1 $\mu$ M, **(F)** LXA<sub>4</sub> 100nM, **(G)** LXA<sub>4</sub> 100nM with BMS-5 10 $\mu$ M.

**Supplemental Table 1. Cytoskeletal Protein Array**

| Protein                                    | NK cell exposure |     |                  | Protein (continued)                                           | NK cell exposure |     |                  |
|--------------------------------------------|------------------|-----|------------------|---------------------------------------------------------------|------------------|-----|------------------|
|                                            | Veh              | Dex | LXA <sub>4</sub> |                                                               | Veh              | Dex | LXA <sub>4</sub> |
| Actin alpha-1 skeletal muscle (N-term)     | +                | +   | +                | MEK1 (Ab-286)                                                 | -                | +   | +                |
| Actin alpha-2/3 (N-term)                   | -                | -   | -                | MEK1 (Ab-291)                                                 | -                | -   | +                |
| Actin Pan (a/b/g) (Ab-55/53)               | -                | -   | +                | MEK1 (Ab-298)                                                 | -                | +   | +                |
| Actin Pan (a/b/g) (Phospho-Tyr55/53)       | -                | -   | -                | MEK1 (Phospho-Ser217)                                         | -                | -   | +                |
| ACTN1 (F-Actin) (inter)                    | -                | -   | -                | MEK1 (Phospho-Ser221)                                         | -                | -   | +                |
| Beta actin                                 | +                | +   | +                | MEK1 (Phospho-Ser298)                                         | -                | -   | -                |
| c-Raf (Ab-296)                             | -                | -   | +                | MEK1 (Phospho-Thr286)                                         | -                | +   | +                |
| c-Raf (Ab-43)                              | -                | +   | +                | MEK1 (Phospho-Thr291)                                         | -                | -   | +                |
| c-Raf (Phospho-Ser296)                     | -                | +   | -                | MEK2 (Ab-394)                                                 | -                | -   | +                |
| c-Raf (Phospho-Ser43)                      | -                | -   | +                | MEK2 (Phospho-Thr394)                                         | -                | -   | +                |
| Calmodulin (Ab-79/81)                      | -                | -   | +                | MEKKK 1 (inter)                                               | -                | -   | -                |
| Calmodulin (Phospho-Thr79/Ser81)           | -                | +   | -                | MEKKK 4 (inter)                                               | -                | -   | -                |
| CaMK1-alpha (Ab-177)                       | -                | +   | -                | Merlin (Ab-10)                                                | -                | +   | +                |
| CaMK1-alpha (Phospho-Thr177)               | -                | -   | +                | Merlin (Ab-518)                                               | -                | -   | +                |
| CaMK1-beta (inter)                         | -                | -   | -                | Merlin (Phospho-Ser10)                                        | +                | +   | +                |
| CaMK2 (Ab-286)                             | -                | -   | +                | Merlin (Phospho-Ser518)                                       | -                | -   | +                |
| CaMK2 (Phospho-Thr286)                     | -                | -   | +                | MKK3/MAP2K3 (Ab-189)                                          | -                | +   | +                |
| CaMK2 (Phospho-Thr305)                     | -                | +   | -                | MKK3/MAP2K3 (Ab-222)                                          | -                | -   | -                |
| CaMK2-beta/gamma (inter)                   | -                | -   | -                | MKK3/MAP2K3 (Phospho-Ser189)                                  | -                | -   | -                |
| CaMK2-beta/gamma/delta (Ab-287)            | -                | -   | +                | MKK3/MAP2K3 (Phospho-Thr222)                                  | -                | -   | -                |
| CaMK2-beta/gamma/delta (Phospho-Thr287)    | -                | -   | +                | MKK6 (Ab-207)                                                 | -                | +   | +                |
| CaMK4 (Ab-196/200)                         | -                | -   | -                | MKK6 (Phospho-Ser207)                                         | +                | +   | +                |
| CaMK4 (Phospho-Thr196/200)                 | -                | -   | +                | MKK7/MAP2K7 (Ab-271)                                          | -                | -   | -                |
| CaMK5 (inter)                              | -                | -   | -                | MKK7/MAP2K7 (Phospho-Ser271)                                  | -                | -   | +                |
| Cofilin (Ab-3)                             | -                | -   | +                | MKK7/MAP2K7 (Phospho-Thr275)                                  | -                | +   | +                |
| Cofilin (Phospho-Ser3)                     | -                | -   | +                | Myosin regulatory light chain 2 (Ab-18)                       | -                | -   | +                |
| Cortactin (Ab-421)                         | -                | -   | +                | Myosin regulatory light chain 2 (Phospho-Ser18)               | -                | +   | +                |
| Cortactin (Ab-466)                         | -                | -   | +                | NCK2 (C-term)                                                 | -                | -   | -                |
| Cortactin (Phospho-Tyr421)                 | +                | +   | +                | p130Cas (Ab-165)                                              | -                | -   | -                |
| Cortactin (Phospho-Tyr466)                 | -                | -   | +                | p130Cas (Ab-410)                                              | -                | -   | -                |
| CrkII (Ab-221)                             | -                | -   | +                | p130Cas (Phospho-Tyr165)                                      | -                | -   | -                |
| CrkII (Phospho-Tyr221)                     | -                | -   | +                | p130Cas (Phospho-Tyr410)                                      | -                | +   | -                |
| CrkL (Phospho-Tyr207)                      | -                | -   | +                | Paxillin (Ab-118)                                             | -                | -   | -                |
| ERK1-p44/42 MAP Kinase (Ab-202)            | -                | -   | +                | Paxillin (Ab-31)                                              | -                | -   | +                |
| ERK1-p44/42 MAP Kinase (Ab-204)            | -                | -   | +                | Paxillin (Phospho-Tyr118)                                     | -                | -   | +                |
| ERK1-p44/42 MAP Kinase (Phospho-Thr202)    | -                | +   | +                | Paxillin (Phospho-Tyr31)                                      | -                | -   | +                |
| ERK1-p44/42 MAP Kinase (Phospho-Tyr204)    | -                | -   | +                | PI3-kinase p85-alpha (Phospho-Tyr607)                         | -                | -   | +                |
| ERK1/2 (N-term)                            | -                | +   | +                | PI3-kinase p85-subunit alpha/gamma (Ab-467/199)               | -                | -   | -                |
| ERK3 (Ab-189)                              | -                | -   | -                | PI3-kinase p85-subunit alpha/gamma (Phospho-Tyr467/Tyr199)    | -                | -   | +                |
| ERK3 (Phospho-Ser189)                      | -                | -   | +                | PIP5K (inter)                                                 | -                | -   | +                |
| ERK8 (Phospho-Thr175/Tyr177)               | -                | -   | +                | PIP5K (Phospho-Ser307)                                        | -                | -   | -                |
| Ezrin (Ab-353)                             | -                | -   | -                | PKA CAT (Ab-197)                                              | -                | +   | +                |
| Ezrin (Ab-478)                             | -                | -   | -                | PKA CAT (Phospho-Thr197)                                      | -                | -   | +                |
| Ezrin (Ab-566)                             | +                | +   | +                | PKC alpha (Ab-657)                                            | -                | -   | -                |
| Ezrin (Phospho-Thr566)                     | +                | +   | +                | PKC alpha (Phospho-Tyr657)                                    | -                | +   | +                |
| Ezrin (Phospho-Tyr353)                     | -                | -   | +                | PKC alpha/beta II (Ab-638)                                    | -                | -   | +                |
| Ezrin (Phospho-Tyr478)                     | -                | -   | +                | PKC alpha/beta II (Phospho-Thr638)                            | -                | -   | -                |
| FAK (Ab-397)                               | -                | -   | +                | PKC pan activation site                                       | -                | -   | +                |
| FAK (Ab-407)                               | -                | +   | -                | PKC pan activation site (Phospho)                             | -                | -   | +                |
| FAK (Ab-576)                               | -                | -   | -                | PLC beta-3 (Ab-1105)                                          | -                | -   | -                |
| FAK (Ab-861)                               | -                | -   | +                | PLC beta-3 (Ab-537)                                           | -                | -   | -                |
| FAK (Ab-910)                               | +                | +   | +                | PLC beta-3 (Phospho-Ser1105)                                  | +                | +   | -                |
| FAK (Ab-925)                               | -                | -   | +                | PLC beta-3 (Phospho-Ser537)                                   | -                | -   | +                |
| FAK (Phospho-Ser910)                       | +                | +   | +                | Rac1/cdc42 (Ab-71)                                            | -                | -   | +                |
| FAK (Phospho-Tyr397)                       | -                | -   | -                | Rac1/cdc42 (Phospho-Ser71)                                    | -                | -   | +                |
| FAK (Phospho-Tyr407)                       | -                | -   | +                | Rho/Rac guanine nucleotide exchange factor 2 (Ab-885)         | -                | -   | -                |
| FAK (Phospho-Tyr576)                       | -                | -   | +                | Rho/Rac guanine nucleotide exchange factor 2 (Phospho-Ser885) | -                | -   | +                |
| FAK (Phospho-Tyr861)                       | -                | -   | +                | Src (Ab-418)                                                  | +                | +   | +                |
| FAK (Phospho-Tyr925)                       | -                | -   | +                | Src (Ab-529)                                                  | -                | -   | +                |
| Filamin A (Ab-2152)                        | -                | -   | +                | Src (Ab-75)                                                   | -                | -   | -                |
| Filamin A (Phospho-Ser2152)                | +                | +   | +                | Src (Phospho-Ser75)                                           | -                | -   | -                |
| Gab2 (Ab-159)                              | -                | -   | -                | Src (Phospho-Tyr216)                                          | -                | -   | +                |
| Gab2 (Phospho-Ser159)                      | -                | -   | +                | Src (Phospho-Tyr418)                                          | -                | -   | +                |
| GAPDH                                      | -                | -   | -                | Src (Phospho-Tyr529)                                          | -                | -   | +                |
| GTPase activating protein (Ab-387)         | -                | -   | +                | VASP (Ab-157)                                                 | +                | +   | +                |
| GTPase activating protein (Phospho-Ser387) | -                | -   | -                | VASP (Ab-238)                                                 | -                | -   | +                |
| LIMK1 (Ab-508)                             | -                | +   | +                | VASP (Phospho-Ser157)                                         | -                | -   | +                |
| LIMK1 (Phospho-Thr508)                     | +                | -   | +                | VASP (Phospho-Ser238)                                         | -                | -   | +                |
| LIMK1/2 (Ab-508/505)                       | +                | +   | +                | WASP (Ab-290)                                                 | -                | -   | +                |
| MEK1 (Ab-217)                              | -                | -   | +                | WASP (Phospho-Tyr290)                                         | -                | -   | -                |
| MEK1 (Ab-221)                              | -                | -   | +                | WAVE1 (Ab-125)                                                | -                | -   | -                |
|                                            |                  |     |                  | WAVE1 (Phospho-Tyr125)                                        | -                | +   | -                |

**Supplemental Table 1. Cytoskeletal Protein Array.** NK cells from healthy donors were exposed to Vehicle, Dexamethasone, or LXA<sub>4</sub> for 48 hours and protein was extracted for screening in this cytoskeletal protein array (see Methods). + denotes positive signal and – denotes lack of signal above background threshold for each of the 141 site-specific and phosphor-specific cytoskeletal proteins included in the cytoskeletal protein array.
